# Supplementary material for: Intercalated reduced graphene oxide and its content effect on the supercapacitance performance of the three dimensional flower-like β-Ni(OH)2 architecture
Source: Royal Society of Chemistry journal article supplement (doi:10.1039/c7nj01915g), 2017-01-01
Supplement: c7nj01915g1.pdf [file c7nj01915g1.pdf]

## Supporting Information

### Intercalated reduced graphene oxide and its content effect on the supercapacitance performance of the three dimensional flower-like $\beta$ -Ni(OH)<sub>2</sub> architecture

Nazish Parveen<sup>1</sup>, Sajid Ali Ansari<sup>1\*</sup>, S. G. Ansari<sup>2</sup>, H. Fouad<sup>3</sup>, and Moo Hwan Cho<sup>1\*</sup>

<sup>1</sup>School of Chemical Engineering, Yeungnam University, Gyeongsan-si, Gyeongbuk 712-749, South Korea, Phone: +82-53-810-2517; Fax: +82-53- 810-4631

<sup>2</sup>Centre for Interdisciplinary Research in Basic Sciences, Jamia Millia Islamia, New Delhi, 110025 India

<sup>3</sup>Department of Applied Medical Science, Riyadh Community College, King Saud University, Riyadh, 11437 Saudi Arabia

\*Corresponding authors: [mhcho@ynu.ac.kr](mailto:mhcho@ynu.ac.kr), [sajidansari@ynu.ac.kr](mailto:sajidansari@ynu.ac.kr)

#### SEM image of 3D-FL-NiH and rGO sheet

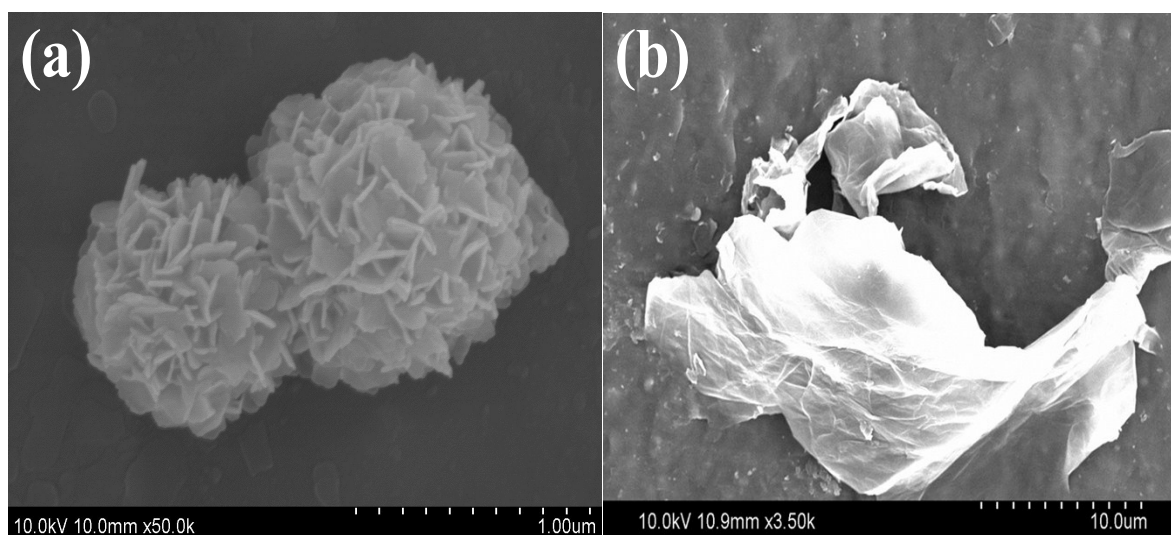

**Fig. S1** SEM image of (a) 3D-FL-NiH and (b) rGO sheet.

### Nitrogen adsorption-desorption isotherm

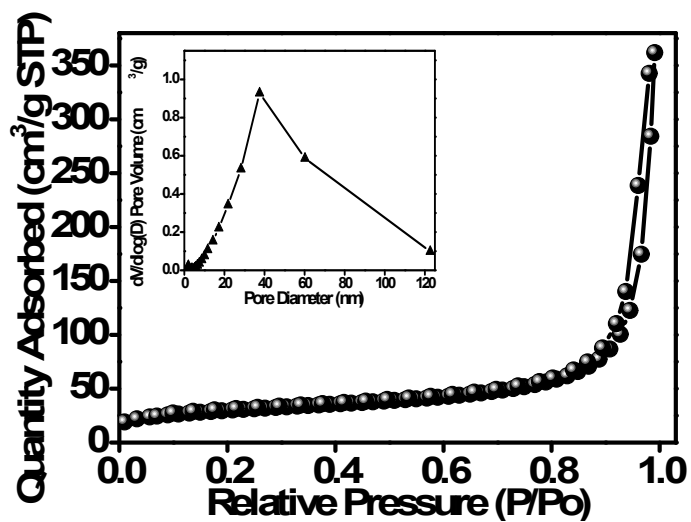

Fig. S2. Nitrogen adsorption-desorption isotherm and pore size distribution of 3D-FL-NiH.

### Thermogravimetric analysis

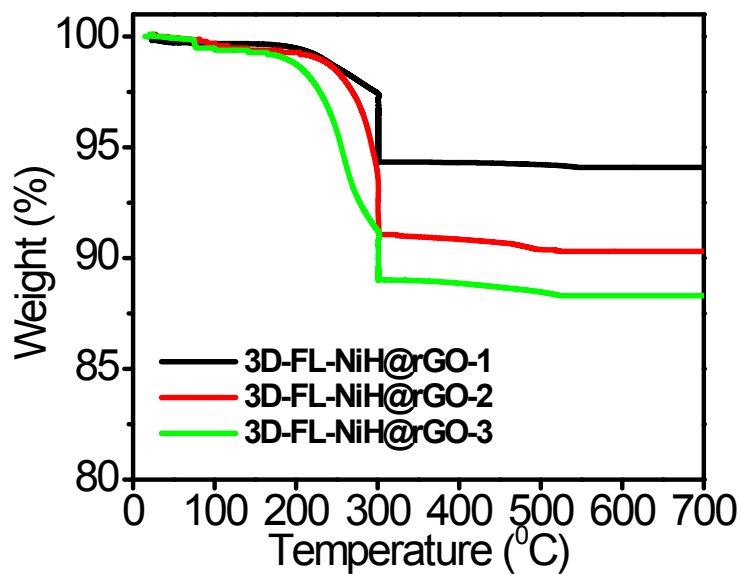

Fig. S3 Thermogravimetric analysis of 3D-FL-NiH@rGO composites.

## FTIR spectra

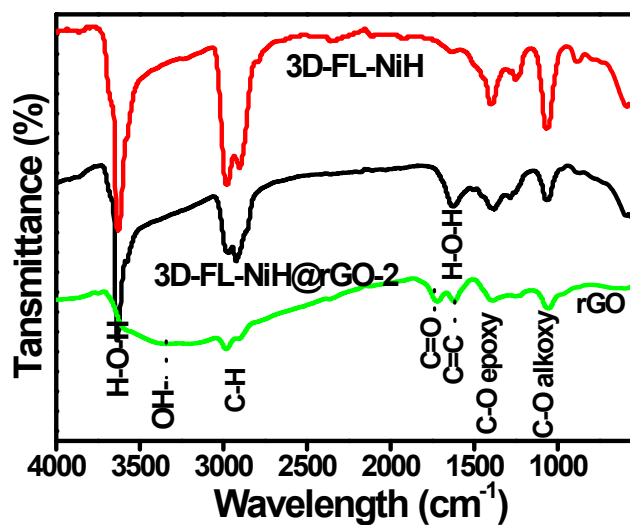

Fig. S4. FTIR spectra of rGO, 3D-FL-NiH and 3D-FL-NiH@rGO-2 composite.

## Cyclic voltammograms of 3D-FL-NiH@rGO composites

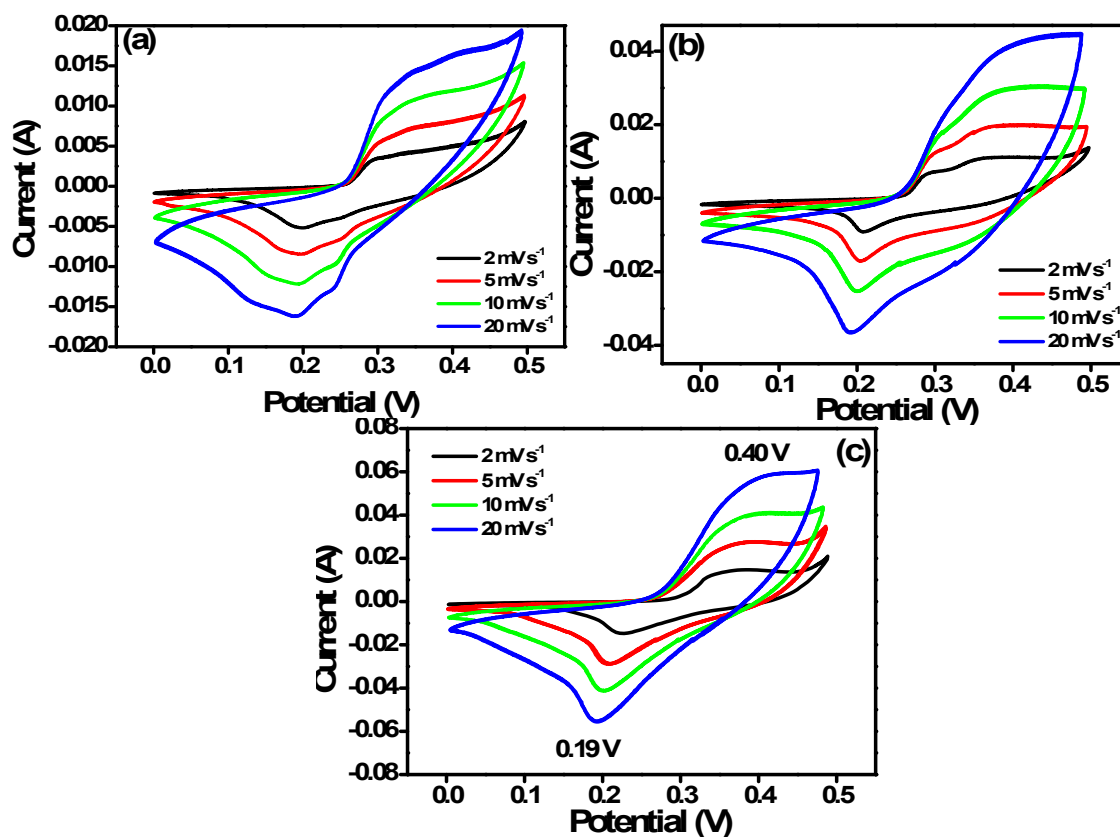

**Fig. S5** Cyclic voltammograms of 3D-FL-NiH@rGO-1, 3D-FL-NiH@rGO-2, 3D-FL-NiH@rGO-3 composites.

**Nyquist plot of 3D-FL-NiH@rGO composites**

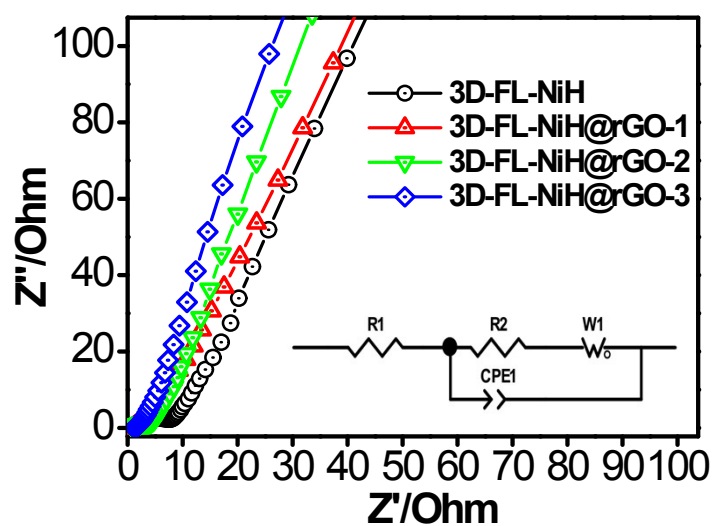

**Fig. S6** EIS Nyquist plots of 3D-FL-NiH and 3D-FL-NiH@rGO composites.
